# Supplementary material for: The balance between gasdermin D and STING signaling shapes the severity of schistosome immunopathology
Source: PubMed Central journal article supplement — Proc Natl Acad Sci U S A. 2023 Mar 21;120(13):e2211047120. doi: 10.1073/pnas.2211047120 (PMC10068786; doi:10.1073/pnas.2211047120), 2023-03-21
Supplement: pnas.2211047120.sapp.pdf [file pnas.2211047120.sapp.pdf]

## Supporting Information for

The balance between Gasdermin D and STING signaling shapes the severity of schistosome immunopathology.

Parisa Kalantari<sup>1,2\*</sup>, Ilana Shecter<sup>1</sup>, Jacob Hopkins<sup>1</sup>, Andrea Pilotta Gois<sup>1</sup>, Yoelkys Morales<sup>1</sup>, Bijan F. Harandi<sup>1</sup>, Shruti Sharma<sup>1</sup>, Miguel J. Stadecker<sup>1</sup>

<sup>1</sup>Department of Immunology, Tufts University School of Medicine, Boston, MA 02111

<sup>2</sup>Department of Veterinary and Biomedical Sciences, Pennsylvania State University, University Park, PA 16802.

\*Parisa Kalantari

Email: [puk103@psu.edu](mailto:puk103@psu.edu)

**This PDF file includes:**

Figures S1 to S5

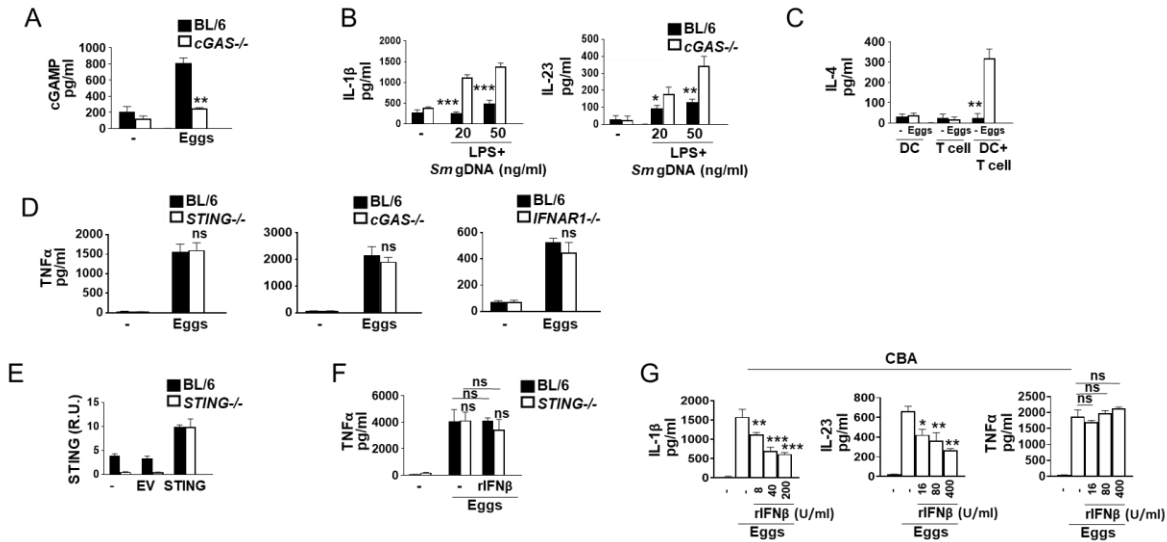

**Fig. S1. (Related to Fig. 1). (A) cGAMP intracellular levels were diminished in egg-stimulated *cGAS*<sup>-/-</sup> BMDCs.**  $2 \times 10^6$  BL/6 and *cGAS*<sup>-/-</sup> BMDCs were plated in six-well plates and cultured with or without 1000 eggs per well for 24h. cGAMP was then measured in cell lysates using ELISA **(B) *Sm* gDNA-mediated proinflammatory cytokine production was enhanced in the absence of *cGAS*.** BL/6 and *cGAS*<sup>-/-</sup> BMDCs were treated with LPS (100ng/ml) and transfected with indicated amounts of *Sm* gDNA using Lipofectamine 2000. IL-1 $\beta$  (left) and IL-23 (right) in the supernatants were measured by ELISA. **(C) CD4<sup>+</sup> T cells are the source of IL-4 in BMDC-T cell-egg cocultures.** BL/6 BMDCs or CD4<sup>+</sup> T cells, or both were cocultured with or without eggs for 72h and IL-4 in the supernatants was measured by ELISA. **(D) The absence of STING, *cGAS* and IFNAR1 does not affect TNF $\alpha$  production in egg- stimulated BMDCs.** BL/6 and *STING*<sup>-/-</sup> (left), *cGAS*<sup>-/-</sup> (center) and *IFNAR1*<sup>-/-</sup> (right) BMDCs were cultured with 80 live eggs and TNF $\alpha$  in the supernatants were measured by ELISA. **(E) Verification of STING overexpression.** BL/6 and *STING*<sup>-/-</sup> BMDCs were transduced with empty vector (EV) or STING. STING overexpression was assessed by qRT-PCR. The mRNA level of STING was set at 10 in BL/6 BMDCs transduced with STING. Bars represent the mean  $\pm$  S.D. STING relative units (R.U.) of three biological replicates from one representative experiment of three with similar results. **(F) Pretreatment of BL/6 and *STING*<sup>-/-</sup> BMDCs with rIFN $\beta$  does not affect TNF $\alpha$  production in response to eggs.** BL/6 and *STING*<sup>-/-</sup> BMDCs were pretreated with rIFN $\beta$  for 1h followed by egg stimulation and TNF $\alpha$  in the supernatants was measured by ELISA. **(G) Pretreatment of egg-stimulated CBA BMDCs with rIFN $\beta$  leads to significant decrease in proinflammatory cytokine production.** CBA BMDCs were pretreated with rIFN $\beta$  for 4h followed by egg stimulation for 24h. Bars in A, B, C, D, F and G represent the mean  $\pm$ SD cytokine levels of three biological replicates from one representative experiment of three with similar results. For this and all figures, unless specified: \*  $p \leq 0.05$ , \*\*  $p \leq 0.005$ , \*\*\*  $p \leq 0.0005$ , ns: not significant.

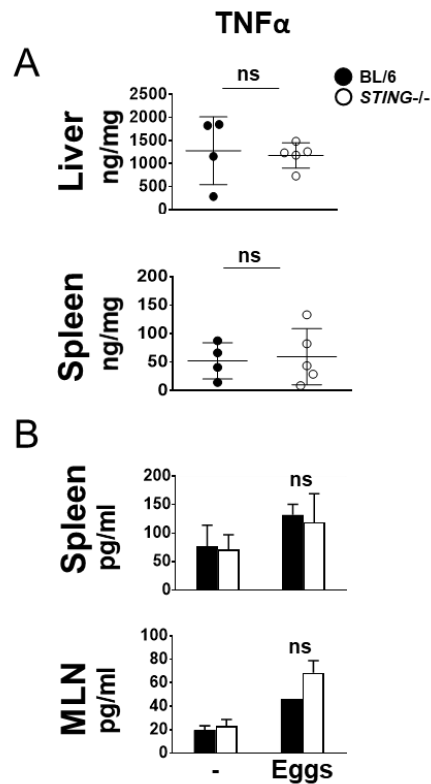

**Fig. S2 (Related to Fig. 3). The absence of STING does not affect TNF $\alpha$  production *in vivo* and *ex vivo*.** (A) Livers and spleens from infected mice were homogenized and TNF $\alpha$  levels were assessed by ELISA. (B) Bulk spleen and MLN and from 4-5 mice per group were pooled and cultured with live eggs. TNF $\alpha$  in 72h supernatants was measured by ELISA. Data in A is representative of one of three independent experiments with similar results. Data in A and B are representative of one of three independent experiments with similar results. Each dot (A) and bar (B) represents mean  $\pm$  S.D. cytokine levels of triplicate determinations per mouse. ns: not significant.

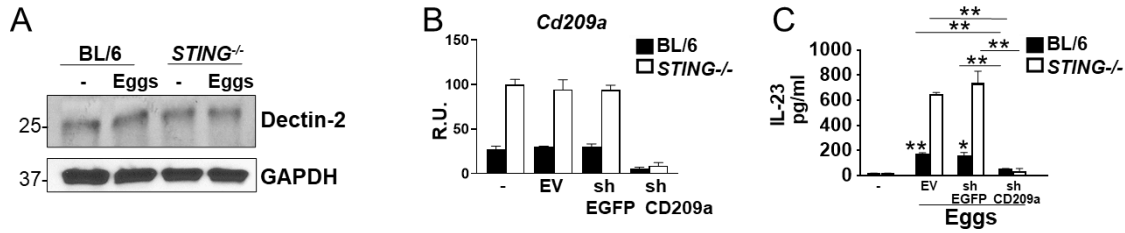

**Fig. S3 (Related to Fig. 4). (A) The loss of STING does not impact Dectin-2 expression.**  $2 \times 10^6$  BL/6 and *STING*<sup>-/-</sup> BMDCs were plated in six-well plates and cultured with or without 1000 eggs per well for 24h. Cell lysates were used for western blot analysis using Abs against Dectin-2 and GAPDH. **(B) Verification of CD209a knockdown in BMDCs.** BL/6 and *STING*<sup>-/-</sup> BMDCs were transduced with empty vector (EV), EGFP shRNA (shEGFP) and CD209a shRNA (shCD209a). The mRNA levels of CD209a were assessed by qRT-PCR. The mRNA level of CD209a was set at 100 in *STING*<sup>-/-</sup> BMDCs transduced with EV. Bars represent the mean  $\pm$  S.D. CD209a relative units (R.U.) of three biological replicates from one representative experiment of three with similar results. **(C) CD209a silencing resulted in a marked reduction of IL-23 in BMDCs.** BMDCs from BL/6 and *STING*<sup>-/-</sup> mice were transduced with EV, shRNA against Enhanced Green Fluorescent Protein (EGFP) (shEGFP) or shRNA against CD209a (shCD209a) and then stimulated with 100 eggs for 24h. IL-23 in culture supernatants were measured by ELISA. Bars represent the mean  $\pm$ SD cytokine levels of three biological replicates from one representative experiment of three with similar results. \*  $p \leq 0.05$ , \*\*  $p \leq 0.005$ .

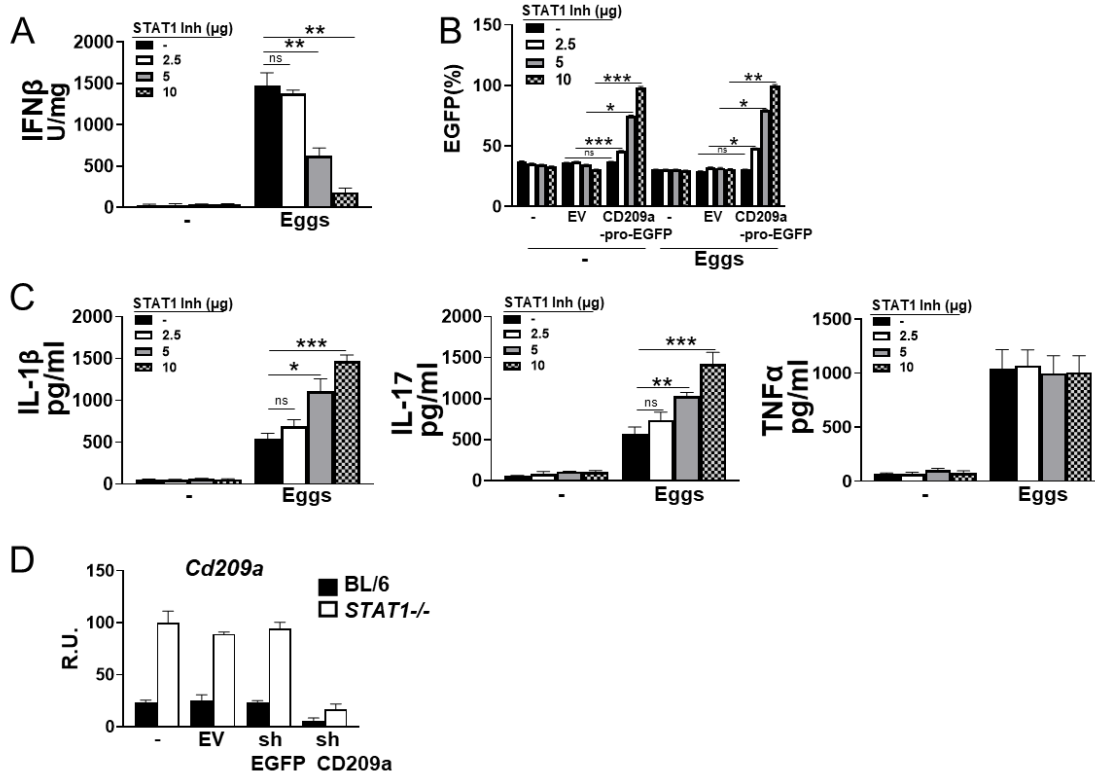

**Fig. S4 (Related to Fig. 5). (A) STAT1 is required for IFN-I production in DCs.** BMDCs from BL/6 mice were pretreated with various concentrations of STAT1 inhibitor Fludarabine phosphate before stimulation with 100 eggs for 24h. IFN $\beta$  levels were then assessed in the supernatants by ELISA. **(B) STAT1 suppresses CD209a promoter activity.** BMDCs from BL/6 mice were transduced with EV or CD209a-promoter (pro)-EGFP and then pretreated with various concentrations of STAT1 inhibitor Fludarabine phosphate before stimulation with 100 eggs for 24h. EGFP levels were measured using a plate reader. Data presented as the percentage of EGFP, with EGFP levels in STAT1 Inhibitor (Inh) (10 $\mu$ g) treated BMDCs being set at 100%. **(C) Inhibition of STAT1 leads to an enhancement of IL-1 $\beta$  and IL-17 but does not affect TNF $\alpha$  production.** BMDCs from BL/6 mice were pretreated with various concentrations of STAT1 inhibitor Fludarabine phosphate before stimulation with 100 eggs for 24h. IL-1 $\beta$  (left), IL-17 (center) and TNF $\alpha$  (right) levels were then assessed in the supernatants by ELISA. Bars in A, B and C represent the mean  $\pm$ SD of three biological replicates from one representative experiment of three with similar results. **(D) Verification of CD209a knockdown in BMDCs.** BL/6 and STAT1 $^{-/-}$  BMDCs were transduced with empty vector (EV), EGFP shRNA (shEGFP) and CD209a shRNA (shCD209a). The mRNA levels of CD209a were assessed by qRT-PCR. The mRNA level of CD209a was set at 100 in STAT1 $^{-/-}$  BMDCs transduced with EV. Bars represent the mean  $\pm$  S.D. CD209a relative units (R.U.) of three biological replicates from one representative experiment of three with similar results. \*  $p \leq 0.05$ , \*\*  $p \leq 0.005$ , \*\*\*  $p \leq 0.0005$ , ns: not significant.

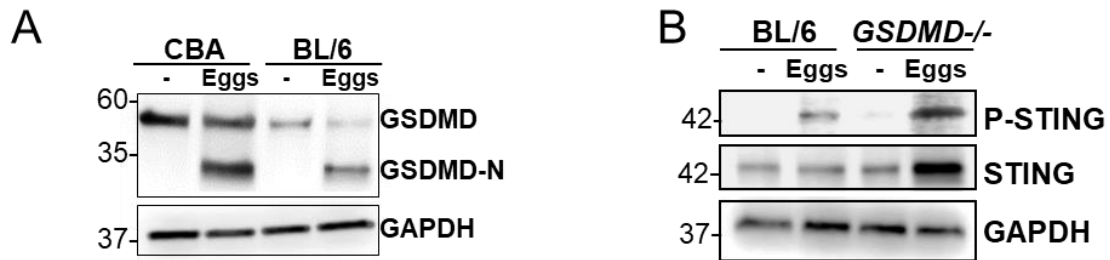

**Fig. S5 (Related to Fig. 6). (A) *Gsdmd* is highly expressed in CBA BMDCs.** Immunoblot analysis of  $2 \times 10^6$  CBA and BL/6 BMDCs plated in six-well plates and stimulated with 1000 live eggs per well for 24h. Cell lysates were used for western blot analysis using Abs against GSDMD and GAPDH. Results are a representative of three independent experiments. **(B) STING is highly phosphorylated in egg-stimulated *GSDMD*<sup>-/-</sup> BMDCs.** Immunoblot analysis of  $2 \times 10^6$  CBA and *GSDMD*<sup>-/-</sup> BMDCs plated in six-well plates and stimulated with 1000 live eggs per well for 24h. Cell lysates were used for western blot analysis using Abs against Phospho-STING, STING and GAPDH. Results are a representative of three independent experiments.
